# Supplementary material
Source: Springer Nature journal article supplement (https://www.springermedizin.de/resource/supplementary/12888_2003_49_MOESM2_ESM.pdf/9481692)

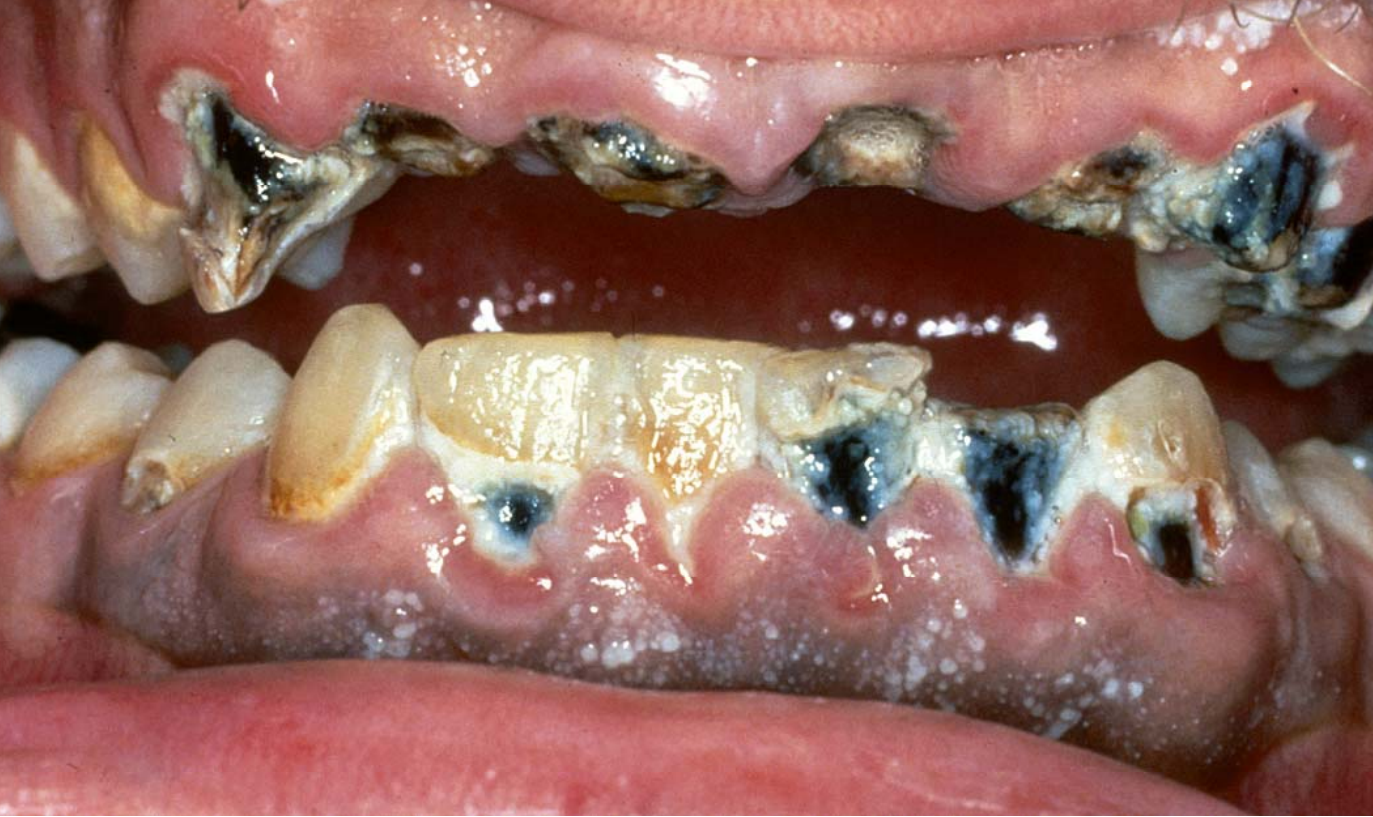

Supplement: MOESM2 [file 9481692]
